# Supplementary material for: Straightforward computational determination of energy-transfer kinetics through the application of the Marcus theory
Source: Royal Society of Chemistry journal article supplement (doi:10.1039/d4sc03352c), 2024-01-01
Supplement: d4sc03352c1.pdf [file d4sc03352c1.pdf]

## SUPPORTING INFORMATION

*for*

---

Straightforward computational determination of energy-transfer  
kinetics through the application of the Marcus theory

Albert Solé-Daura,<sup>a</sup> and Feliu Maseras<sup>a,\*</sup>

<sup>a</sup> *Institute of Chemical Research of Catalonia (ICIQ-CERCA), The Barcelona Institute of  
Science and Technology, Avda. Països Catalans, 16, 43007 Tarragona, Spain.*

*E-mail: fmaseras@iciq.es*

## Contents

|   |                                                                                                                 |    |
|---|-----------------------------------------------------------------------------------------------------------------|----|
| 1 | Additional details about the application of the Marcus theory.                                                  | 2  |
| 2 | Discussion about the existence of two minima on the triplet surface of 4.                                       | 4  |
| 3 | Summary of the calculated parameters used in the Marcus theory.                                                 | 5  |
| 4 | Analysis of the theoretical rate constants derived from the application of the asymmetric Marcus approach.      | 7  |
| 5 | Analysis of the factors governing the EnT free-energy barriers from excited photocatalysts to $3_E$ and $3_Z$ . | 10 |
| 6 | Methodology benchmark and calculated triplet energies for the studied photocatalysts.                           | 13 |
| 7 | Cartesian coordinates ( $\text{\AA}$ ) of the optimized structures at the B3LYP-D3BJ/cc-pVDZ,LANL2DZ(f) level   | 14 |

# 1 Additional details about the application of the Marcus theory.

Classical vs. Semi-classical Marcus theory.

Free-energy basins of **reactants** and **products** states described as parabolic functions, where  $k_R$  and  $k_P$  determine their amplitudes:

$$G_R(q) = G_R(q_R) + \frac{1}{2} k_R (q - q_R)^2$$

$$G_P(q) = G_P(q_P) + \frac{1}{2} k_P (q - q_P)^2$$

Classical Marcus Theory

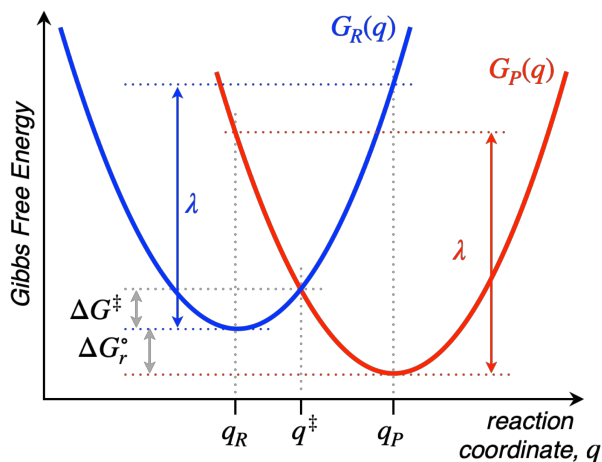

$$k_{EnT} = \frac{k_B T}{h} \exp\left(-\frac{(\lambda + \Delta G_r^\circ)^2}{4\lambda k_B T}\right)$$

Semi-classical Marcus Theory

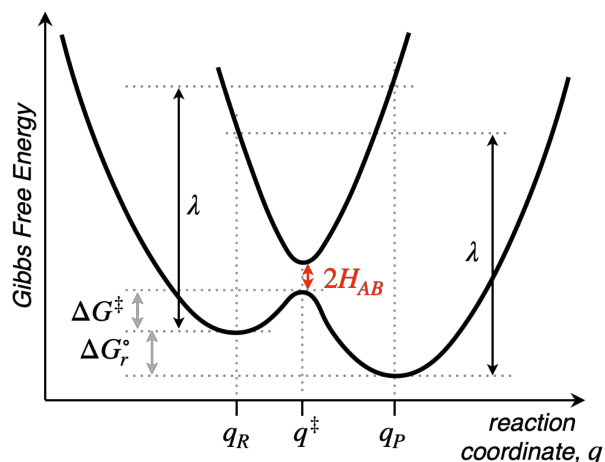

$$k_{EnT} = \frac{2\pi |H_{AB}|^2}{\hbar \sqrt{4\pi\lambda k_B T}} \exp\left(-\frac{(\lambda + \Delta G_r^\circ)^2}{4\lambda k_B T}\right)$$

Figure S 1: Comparison of the classical (left) and semi-classical (right) versions of the Marcus Theory and their impact on EnT rate constants.  $H_{AB}$  stands for the electronic coupling between initial and final states.

Symmetric vs. Asymmetric Marcus approach.

Symmetric approach:

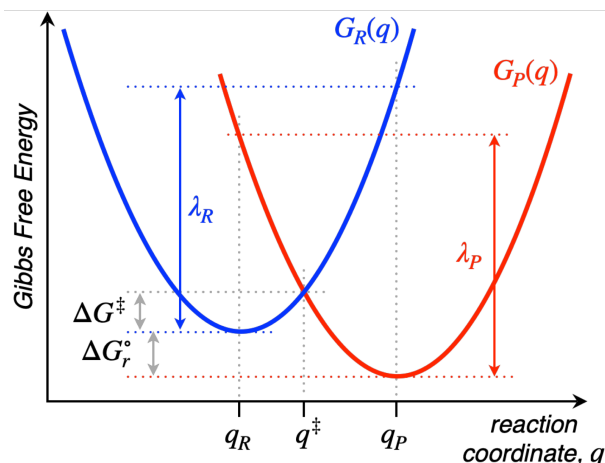

$$k_R = k_P$$

$$\lambda_R = \lambda_P = \lambda$$

$$\Delta G^\ddagger = \frac{(\lambda + \Delta G_r^\circ)^2}{4\lambda}$$

Asymmetric approach:

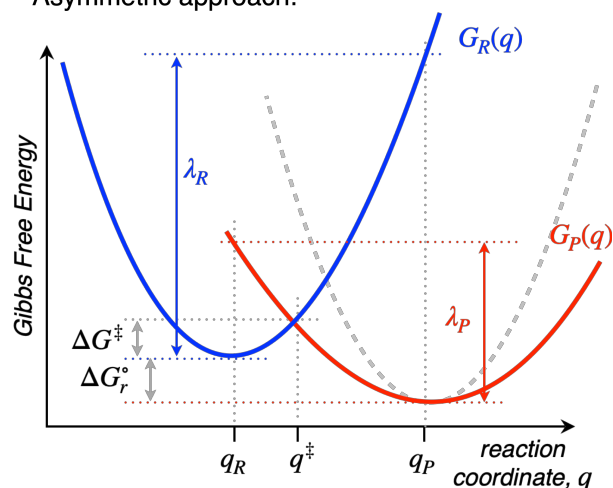

$$k_R \neq k_P$$

$$\lambda_R \neq \lambda_P$$

$$\Delta G^\ddagger = \lambda_R \left( \frac{-\lambda_P + \sqrt{\lambda_R \lambda_P + (\lambda_R - \lambda_P) \Delta G_r^\circ}}{\lambda_R - \lambda_P} \right)^2$$

Figure S 2: Graphical representation of the impact of the relative amplitude of parabolas describing reactants and products states on the height of the free-energy barrier. In the asymmetric scenario, the gray dashed parabola represents what would be assumed if the symmetric approach were applied to a system where the free-energy curves of reactants and products have distinct amplitudes.

## 2 Discussion about the existence of two minima on the triplet surface of **4**.

As mentioned in the main text and shown in Figure 5, we characterized two minima for substrate **4** on the triplet-state energy surface. The first one, labeled as  ${}^3\mathbf{4}$ , corresponds to the twisted configuration analogous to that obtained for **1-3** (see Figure S3 for a representation of the spin density on the optimized geometry of  ${}^3\mathbf{4}$ ), which was obtained when relaxing the *Z* isomer on the triplet-state surface. The second ( ${}^3\mathbf{4}'$ ), obtained when steaming from the *E* conformer, is 6.8 kcal mol<sup>-1</sup> less stable and corresponds to a structure whereby the planarity of the system is preserved (Figure S3 and Figure 5, main text). The existence of this second minimum for **4** was ascribed to a higher delocalization of the spin density in the flat configuration compared to the other substrates, granted by the highly-conjugated naphthalene substituent, thus stabilizing a local minimum with  $\Phi = 180^\circ$  by reducing the repulsion between electrons of the same spin. Note that a flat triplet minimum with a *Z*-like configuration could not be located, most likely due to steric repulsion between the oxygen atom of the ester group and the naphthalene substituent, which destabilizes the flat configuration, preventing an efficient conjugation of the  $\pi$  system. As a matter of fact, deviation from planarity of the naphthalene group with respect to the double bond was found to be larger in the *Z* isomer ( $54.1^\circ$ ) compared to the *E* one ( $20.6^\circ$ ).

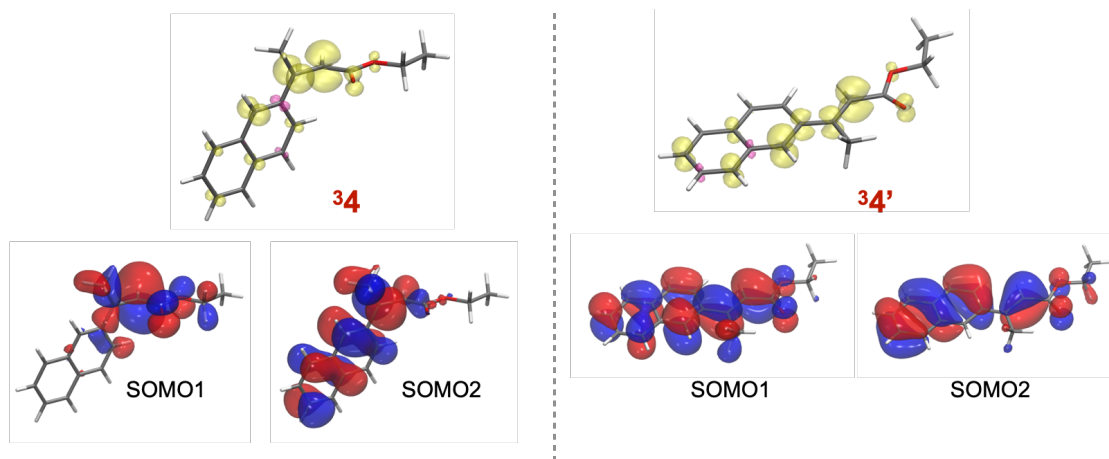

Figure S 3: Spin density distribution and singly occupied molecular orbitals (SOMOs) represented on the optimized structures of  ${}^3\mathbf{4}$ ,  $\Phi \approx 90^\circ$  (left) and  ${}^3\mathbf{4}'$ ,  $\Phi \approx 180^\circ$  (right)

### 3 Summary of the calculated parameters used in the Marcus theory.

Table S 1: Calculated reorganization energies (kcal mol<sup>-1</sup>) for all the studied species on the reactants ( $\lambda_R$ ) and products ( $\lambda_P$ ) surfaces of the <sup>3</sup>PC + substrate → PC + <sup>3</sup>substrate reaction

| pair                             | $\lambda_R$ | $\lambda_P$ |
|----------------------------------|-------------|-------------|
| <sup>3</sup> TX*/TX              | 4.8         | 4.1         |
| 1 <sub>E</sub> / <sup>3</sup> 1  | 71.9        | 32.7        |
| 1 <sub>Z</sub> / <sup>3</sup> 1  | 71.0        | 26.1        |
| 2 <sub>E</sub> / <sup>3</sup> 2  | 61.3        | 21.7        |
| 2 <sub>Z</sub> / <sup>3</sup> 2  | 59.8        | 33.0        |
| 3 <sub>E</sub> / <sup>3</sup> 3  | 63.0        | 23.3        |
| 3 <sub>Z</sub> / <sup>3</sup> 3  | 62.9        | 33.8        |
| 4 <sub>E</sub> / <sup>3</sup> 4' | 10.5        | 9.2         |
| 4 <sub>Z</sub> / <sup>3</sup> 4  | 59.2        | 22.3        |
| <sup>3</sup> Ir-A/Ir-A           | 13.1        | 8.3         |
| <sup>3</sup> Ir-B/Ir-B           | 7.3         | 5.1         |
| <sup>3</sup> Ir-C/Ir-C           | 6.6         | 3.3         |
| <sup>3</sup> Ir-D/Ir-D           | 7.9         | 5.9         |
| <sup>3</sup> Ir-E/Ir-E           | 11.1        | 11.8        |
| <sup>3</sup> Ru/Ru               | 8.2         | 3.5         |

Table S 2: Kinetic and thermodynamic parameters (kcal mol<sup>-1</sup>) for the sensitization of **3<sub>E</sub>** and **3<sub>Z</sub>** by Ir(III)- and Ru(II)-based photocatalysts (PCs).

| PC   | substrate            | $\Delta G^{\ddagger}_{exp.}$ | $\Delta G^{\circ}_r$ | $\lambda_R$ | $\lambda_P$ | $\Delta G^{\ddagger}_{symm.}$ | $\Delta\Delta G^{\ddagger}_{symm.}$ | $\Delta G^{\ddagger}_{asymm.}$ | $\Delta\Delta G^{\ddagger}_{asymm.}$ |
|------|----------------------|------------------------------|----------------------|-------------|-------------|-------------------------------|-------------------------------------|--------------------------------|--------------------------------------|
| Ir-A | <b>3<sub>E</sub></b> | 8.2                          | -3.1                 | 76.1        | 31.6        | 12.0                          | -3.8                                | 9.9                            | -1.7                                 |
|      | <b>3<sub>Z</sub></b> | 9.7                          | -3.2                 | 76.0        | 42.0        | 13.2                          | -3.5                                | 12.0                           | -2.3                                 |
| Ir-B | <b>3<sub>E</sub></b> | 6.5                          | -8.2                 | 70.3        | 28.4        | 8.6                           | -2.1                                | 6.0                            | +0.5                                 |
|      | <b>3<sub>Z</sub></b> | 8.1                          | -8.4                 | 70.2        | 38.1        | 9.8                           | -1.7                                | 8.3                            | -0.3                                 |
| Ir-C | <b>3<sub>E</sub></b> | 5.4                          | -15.4                | 69.6        | 26.6        | 5.6                           | -0.2                                | 2.3                            | +3.0                                 |
|      | <b>3<sub>Z</sub></b> | 6.7                          | -15.6                | 69.5        | 37.0        | 6.7                           | 0.0                                 | 4.7                            | +2.0                                 |
| Ir-D | <b>3<sub>E</sub></b> | 5.1                          | -12.8                | 70.9        | 29.2        | 6.9                           | -1.8                                | 4.1                            | +1.1                                 |
|      | <b>3<sub>Z</sub></b> | 6.4                          | -13.0                | 70.9        | 39.6        | 8.1                           | -1.7                                | 6.4                            | 0.0                                  |
| Ir-E | <b>3<sub>E</sub></b> | 4.6                          | -15.3                | 74.1        | 35.0        | 7.1                           | -2.5                                | 4.6                            | +0.1                                 |
|      | <b>3<sub>Z</sub></b> | 5.0                          | -15.5                | 74.0        | 45.5        | 8.2                           | -3.2                                | 6.7                            | -1.7                                 |
| Ru   | <b>3<sub>E</sub></b> | -                            | -0.6                 | 71.2        | 26.8        | 11.9                          | -                                   | 9.9                            | -                                    |
|      | <b>3<sub>Z</sub></b> | -                            | -0.8                 | 71.2        | 37.3        | 13.2                          | -                                   | 12.1                           | -                                    |
|      |                      |                              |                      |             |             | MAE =                         | 2.0                                 | MAE =                          | 1.3                                  |

#### 4 Analysis of the theoretical rate constants derived from the application of the asymmetric Marcus approach.

Owing to the good agreement between calculated barriers and those derived from experimental rate constants (see main text), the theoretical rate constants are also in line with the experimental ones, as shown in Table S3. Note however, that rate constants are strongly sensitive to computational error due to their exponential dependence on free-energy barriers. In fact, a difference of only 1 kcal mol<sup>-1</sup> in the height of the barrier, which falls within the range of computational uncertainty, entails variations of one order of magnitude on the derived rate constant. On these grounds, we consider that the agreement between experimental and theoretical rate constants is more than acceptable. Additionally, the theoretical barriers can also reproduce the experimental selectivity trends.[1] Specifically, they lead to a  $k_Z/k_E$  ratio >1 for substrate **1**, indicating minor *E*-isomer sensitization and thus, major *E*-isomer formation; and  $k_Z/k_E$  ratios <1 for substrates **2** and **3**, for which a preference for the *Z*-isomer formation was also experimentally reported.[1] In fact, as shown in Figure S4, the construction of microkinetic models based on theoretical rate constants can correctly reproduce the experimental selectivity trend. Unfortunately, a quantitative theoretical determination of reaction outcomes in terms of amounts of *E* and *Z* isomer would require extremely accurate barriers with errors significantly smaller than 1 kcal mol<sup>-1</sup>, which is out of reach for DFT, and most likely, even for more sophisticated and demanding computational methods. As a matter of fact, decreasing the  $\Delta\Delta G^\ddagger$  between *E*- and *Z*-isomer sensitization by only 1.5 kcal mol<sup>-1</sup> for substrates **2** and **3** leads to *E*:*Z* product ratios that are in good quantitative agreement with experimental ones (see Figure S4)

Obviously, the above analysis cannot apply to substrate **4**, whose sensitization is diffusion controlled. In these cases, a *E*:*Z* ratio close to 50:50 (as experimentally found by Kerzig, Gilmour and co-workers)[1] may be always expected, as diffusion barriers cannot discern between *E* and *Z* isomers of the same molecule and hence, the sensitization process cannot be selective at all.



Table S 3: Comparison of experimental and theoretical rate constants and constants and barrier ratios for the sensitization of *Z* and *E* isomers of substrates **1-3**

| Substrate | $k_{EnT}$ exp. /<br>$10^9 \text{ M}^{-1} \text{ s}^{-1}$ | $k_{EnT}$ calc.<br>$10^9 \text{ M}^{-1} \text{ s}^{-1}$ | $k_Z/k_E$<br>exp. | $k_Z/k_E$<br>calc. | $\Delta G_Z^\ddagger/\Delta G_E^\ddagger$<br>exp. | $\Delta G_Z^\ddagger/\Delta G_E^\ddagger$<br>calc. |
|-----------|----------------------------------------------------------|---------------------------------------------------------|-------------------|--------------------|---------------------------------------------------|----------------------------------------------------|
| $1_Z$     | 0.583                                                    | 0.142                                                   | 30.7              | 39.3               | 0.73                                              | 0.74                                               |
| $1_E$     | 0.019                                                    | 0.004                                                   |                   |                    |                                                   |                                                    |
| $2_Z$     | 2.60                                                     | 0.54                                                    | 0.38              | 0.03               | 1.14                                              | 1.62                                               |
| $2_E$     | 6.76                                                     | 18.9                                                    |                   |                    |                                                   |                                                    |
| $3_Z$     | 3.25                                                     | 0.14                                                    | 0.46              | 0.02               | 1.05                                              | 1.51                                               |
| $3_E$     | 7.02                                                     | 8.38                                                    |                   |                    |                                                   |                                                    |

Equations used in microkinetic models to produce the results shown in Figure S4:

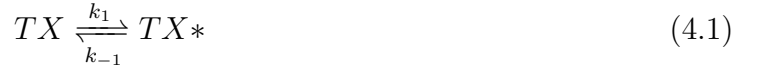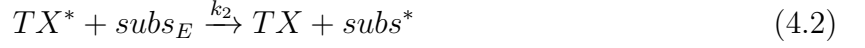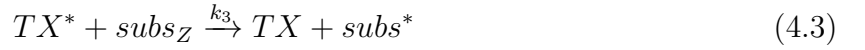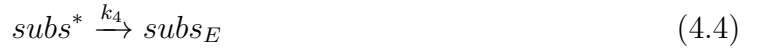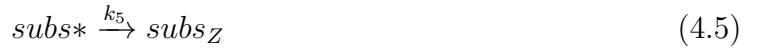

$k_1$  was fitted to  $10^{-1} \text{ s}^{-1}$ , so that the reaction is completed within 1h, as in the experimental reference.[1]  $k_{-1}$  was estimated from the experimental lifetime of  $TX^*$  (77  $\mu\text{s}$ ), assuming first-order kinetics.  $k_2$  and  $k_3$  (EnT events) were derived from theoretical free-energy barriers. Finally,  $k_4$  and  $k_5$  were both set to  $10^{11} \text{ s}^{-1}$  for the sake of being faster than EnT processes and equal for  $\text{subs}^*$  to yield either *E* or *Z* products. Initial concentrations:[1]

$$[\text{subs}_Z] = 6 \times 10^{-2} \text{ M}; [\text{TX}] = 6 \times 10^{-4} \text{ M}; [\text{subs}_E] = [\text{subs}^*] = [\text{TX}^*] = 0.$$

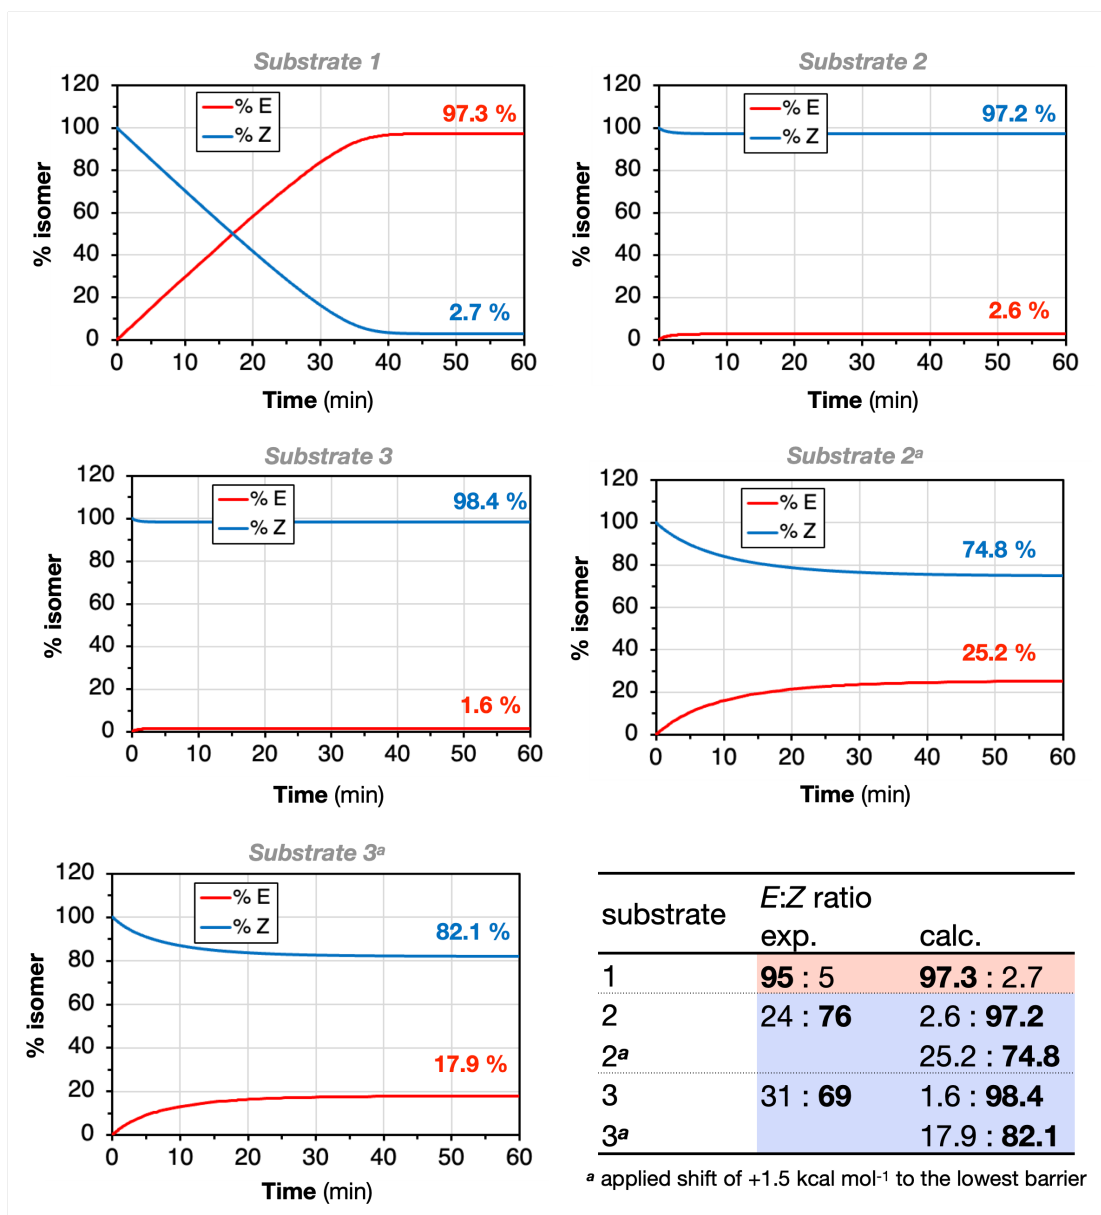

Figure S 4: Evolution of *E*:*Z* product ratios as function of reaction time as derived from the microkinetic model presented above. Asterisk marks denote that in those models, the free-energy barrier for the fastest EnT event has been shifted by +1.5 kcal mol<sup>-1</sup> and the table compares *E*:*Z* ratios at the end of the simulation with experimental ones.[1] Within the table, red and blue coloring represents experimental selectivity towards *E* or *Z* isomers, respectively, which is qualitatively, if not quantitatively reproduced by our microkinetic models in all cases.

## 5 Analysis of the factors governing the EnT free-energy barriers from excited photocatalysts to $\mathbf{3}_E$ and $\mathbf{3}_Z$ .

As shown in Figure S5, neither the computationally-determined barriers nor the experimental ones are solely determined by the triplet energy of the analyzed PCs, which are implicit in the reaction free energies (Figure S5a,d), although they roughly correlate. Conversely, our results also evidence that their intrinsic reorganization energies have an important weight on the height of the barriers (Figure S5b,c,e,f), correlating even better with the barriers than the reaction energies themselves.

Consequently, this causes that PCs that entail distinct reaction energies display similar barriers, due to the compensating effect of the reorganization energies. For instance, even though the EnT from **Ir-A** to  $\mathbf{3}_E$  is thermodynamically less favorable than that of **Ir-B** to  $\mathbf{3}_Z$  ( $\Delta G_r^\circ$  of -3.1 vs -8.4 kcal mol<sup>-1</sup>, respectively, entries 1 and 4 in Table S2), they both exhibit very similar barriers, which is explained by the fact that the  $\lambda_P$  of the latter is significantly higher.

Similarly, although **Ir-A** and **Ru** exhibit rather different triplet energies (see Table S5) they were predicted to show similar barriers, owing to the much smaller reorganization energies determined for **Ru** compared to **Ir-A** (Table S1).

It is also interesting to note that Gilmour and Kerzig observed that thioxanthone-based photocatalysts sensitize substrates faster than Ir-based photocatalysts with similar triplet energies.[1] This can be easily rationalized using the Marcus theory and the above-reported parameters as follows:

According to the Marcus theory, barriers are a function of reaction free energies ( $\Delta G_r^\circ$ ) and reorganization energies ( $\lambda$  parameters). The more exergonic the reaction, the lower the barrier; and the smaller the reorganization energy, the lower the barrier too (see eq. 3 and 4 in the main text). When comparing the **Ir-D** and **TX** catalysts, although they exhibit similar triplet energies, which translate into almost equal reaction free energies (see Table 1 in the main text and Table S2), they sensitize alkene substrates at a different rate. Hence, the discrepancies in the rate constants (and thus the barriers) arise from their distinct reorganization energies. As shown in Table S1, the reorganization energies calculated for **TX** (4.1-4.8 kcal mol<sup>-1</sup>) are smaller than those measured for **Ir-D** (5.9-7.9 kcal mol<sup>-1</sup>). Consequently, the EnT barriers are lower for **TX**, explaining the experimental outcomes by

Gilmour and Kerzig and co-workers.[1]

To further support these conclusions, we have carried out additional calculations on the sensitization of  $3_E$  and  $3_Z$  by 2,7-Dimethoxy-9*H*-thioxanthen-9-one (**MeOTX**), which was also found to sensitize substrates faster than Ir-based PCs with similar triplet energies. Specifically, the reorganization energy of **MeOTX** (4.2 kcal mol<sup>-1</sup>, both on reactants and products surfaces) was computed to be very similar to that of **TX** (4.4 kcal mol<sup>-1</sup>, on average) and hence, also smaller than that of Ir-based PCs, which are typically larger than 6 kcal mol<sup>-1</sup> when averaged over reactants and products surfaces. Also in qualitative agreement with experimental findings,[1] free-energy barriers obtained for **MeOTX** were found to be *ca.* 5 kcal mol<sup>-1</sup> higher than those involving **TX**. This can be explained by the lower triplet energy of **MeOTX**,[1] which leads to less favorable EnT thermodynamics. Specifically, the sensitization free energies by **MeOTX** (-2.5 and -2.7 kcal mol<sup>-1</sup> for  $3_E$  and  $3_Z$ , respectively) are significantly less exergonic than those involving **TX** (-11.9 and -12.1 kcal mol<sup>-1</sup>). Thus, although both PCs display similar reorganization energies, their distinct reaction kinetics are due to different thermodynamic driving forces.

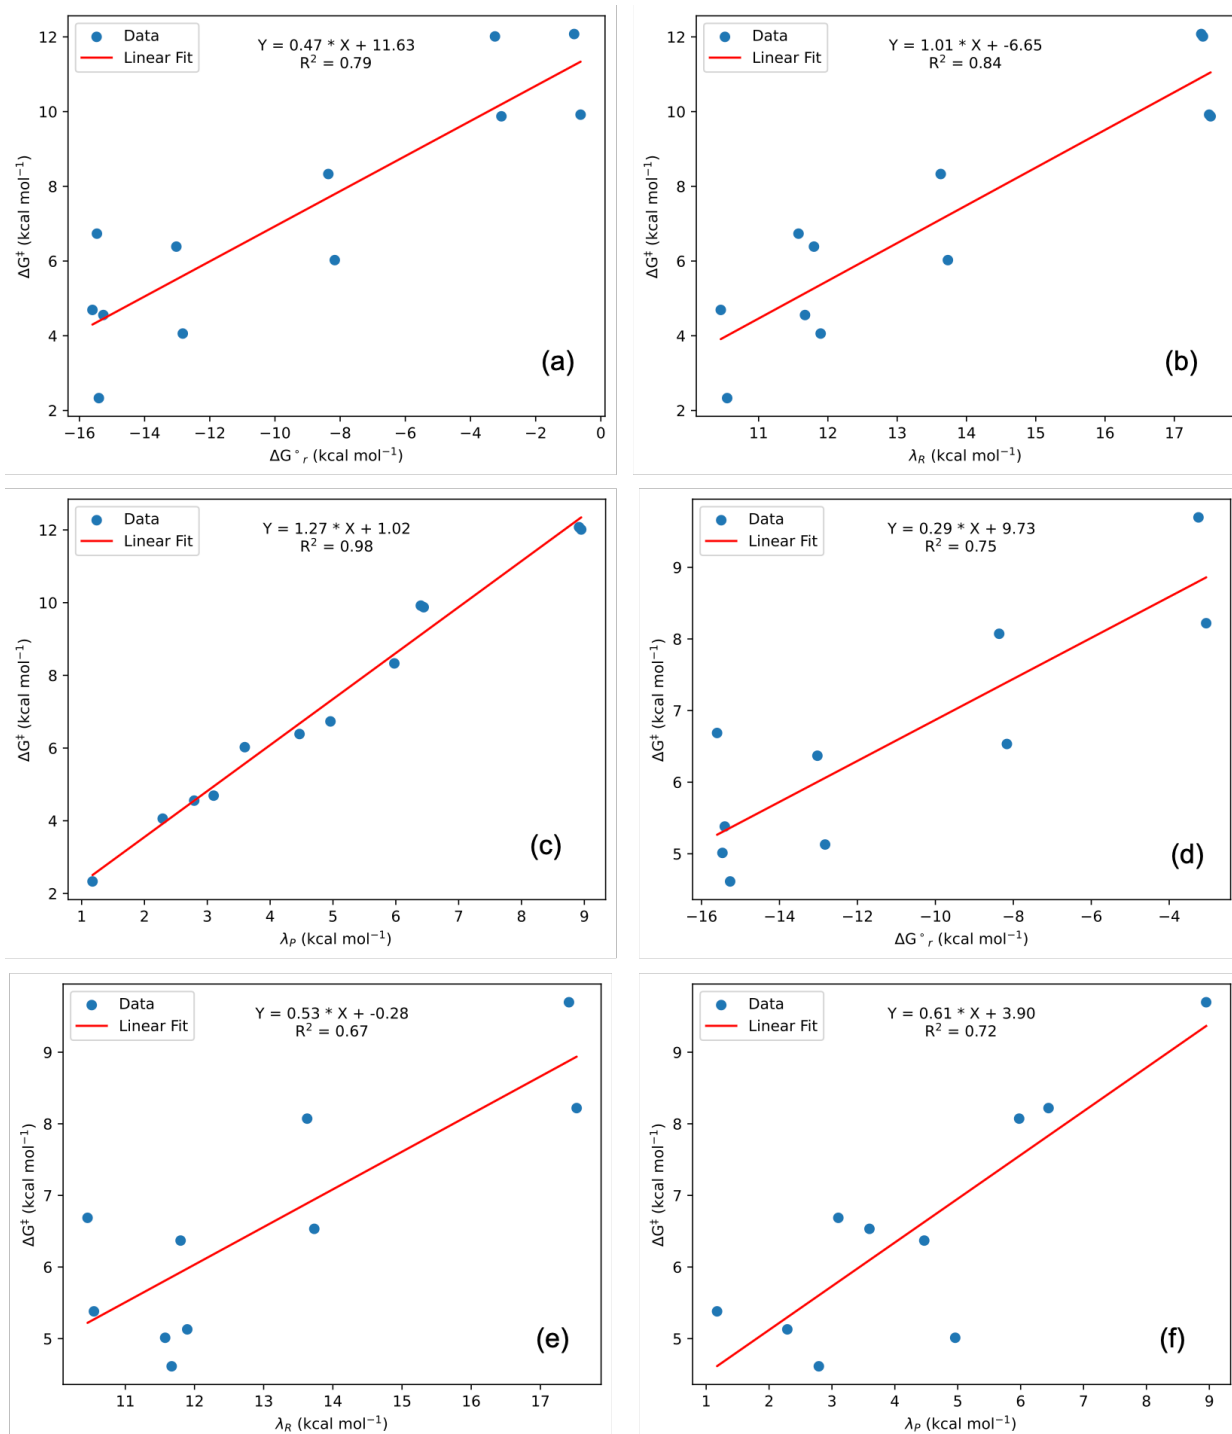

Figure S 5: Linear fitting of the  $\Delta G_r^\circ$  for EnT processes from Ir- and Ru-based photocatalysts to  $\mathbf{3}_E$  and  $\mathbf{3}_Z$  and contributions to  $\lambda_R$  and  $\lambda_P$  of the PCs with the free-energy barriers obtained either computationally through the asymmetric Marcus equation (a-c) or from experimental rate constants[1] (d-f).

## 6 Methodology benchmark and calculated triplet energies for the studied photocatalysts.

Table S 4: Comparison of the performance of several density functionals in predicting the triplet energy of **TX**. The experimental value of 63.4 kcal mol<sup>-1</sup> was determined from the phosphorescence emission wavelength in 2-Methyltetrahydrofuran ( $\epsilon = 6.97$ ).[1]

| E[ $\rho$ ]     | $\Delta E_{triplet-singlet}$        |                                   |
|-----------------|-------------------------------------|-----------------------------------|
|                 | IEF-PCM (MeCN, $\epsilon = 35.69$ ) | IEF-PCM (THF, $\epsilon = 7.43$ ) |
| B3LYP-D3BJ      | 60.3                                | 61.0                              |
| $\omega$ B97X-D | 67.0                                | 67.9                              |
| PBE0-D3BJ       | 61.2                                | 61.9                              |
| TPSSH-D3BJ      | 58.6                                | 59.2                              |
| PBE-D3BJ        | 55.5                                | 56.1                              |

Table S 5: Comparison of the DFT (B3LYP-D3BJ)-derived triplet energies (kcal mol<sup>-1</sup>) for Ir- and Ru-based photocatalysts with the experimental ones.[1]

| PC   | $\Delta E_{triplet-singlet}$ |       |
|------|------------------------------|-------|
|      | exp.                         | calc. |
| Ir-A | 55.6                         | 51.3  |
| Ir-B | 59.3                         | 57.0  |
| Ir-C | 62.5                         | 61.9  |
| Ir-D | 63.4                         | 62.6  |
| Ir-E | 67.1                         | 64.2  |
| Ru   | 50.5                         | 49.5  |

**7 Cartesian coordinates (Å) of the optimized structures at the B3LYP-D3BJ/cc-pVDZ,LANL2DZ(f) level**

**1<sub>E</sub>**

Atom X Y Z

1 C -1.0181 0.3787 0.0131  
2 C -0.2812 1.5059 0.0290  
3 H 0.8102 1.5017 -0.0371  
4 C -0.3870 -0.9805 -0.1032  
5 H 0.7103 -0.9328 -0.1658  
6 H -0.6680 -1.6079 0.7607  
7 H -0.7725 -1.5039 -0.9956  
8 C -0.9509 2.8134 0.1356  
9 O -2.1638 2.9683 0.2101  
10 O -0.0769 3.8339 0.1409  
11 C -0.6436 5.1643 0.2419  
12 H -1.3281 5.3196 -0.6065  
13 H -1.2370 5.2239 1.1674  
14 B -2.5889 0.4205 0.1171  
15 O -3.4001 0.3219 -0.9841  
16 O -3.2569 0.3195 1.3103  
17 C -4.7825 0.4248 -0.5085  
18 C -4.6527 0.0013 1.0039  
19 C -5.2065 1.8818 -0.7006  
20 C -5.6494 -0.4968 -1.3557  
21 C -4.8097 -1.5031 1.2307  
22 C -5.5439 0.7804 1.9616  
23 H -4.5656 2.5604 -0.1233  
24 H -5.1036 2.1410 -1.7652  
25 H -6.2565 2.0331 -0.4102  
26 H -5.2668 -1.5255 -1.3612  
27 H -6.6832 -0.5078 -0.9772

28 H -5.6711 -0.1324 -2.3936  
29 H -4.5107 -1.7400 2.2625  
30 H -5.8514 -1.8260 1.0892  
31 H -4.1678 -2.0792 0.5481  
32 H -5.3800 0.4270 2.9907  
33 H -5.3278 1.8558 1.9284  
34 H -6.6052 0.6261 1.7128  
35 C 0.5069 6.1467 0.2356  
36 H 1.0894 6.0634 -0.6950  
37 H 0.1179 7.1737 0.3105  
38 H 1.1808 5.9679 1.0878

### **1<sub>z</sub>**

Atom X Y Z

1 C -0.9859 0.2637 0.1096  
2 C -0.3940 1.4766 0.0128  
3 H 0.6803 1.5389 -0.1725  
4 C -2.4587 0.0573 0.3605  
5 H -3.0602 0.4821 -0.4591  
6 H -2.6933 -1.0112 0.4546  
7 H -2.7858 0.5818 1.2712  
8 C -1.0901 2.7723 0.1403  
9 O -2.2840 2.9424 0.3297  
10 O -0.2122 3.7937 0.0167  
11 C -0.7660 5.1260 0.1218  
12 H -1.5382 5.2504 -0.6536  
13 H -1.2587 5.2281 1.1017  
14 B -0.0649 -0.9918 -0.0502  
15 O 1.2911 -0.9213 -0.2467  
16 O -0.5460 -2.2739 -0.0040  
17 C 1.7506 -2.2720 -0.5787  
18 C 0.6122 -3.1719 0.0297  
19 C 1.8277 -2.3428 -2.1045  
20 C 3.1280 -2.4796 0.0345



21 C 0.8409 -3.5272 1.4994  
22 C 0.2812 -4.4197 -0.7763  
23 H 0.8378 -2.2016 -2.5628  
24 H 2.4904 -1.5427 -2.4652  
25 H 2.2348 -3.3077 -2.4398  
26 H 3.1281 -2.2727 1.1123  
27 H 3.4677 -3.5143 -0.1257  
28 H 3.8525 -1.8052 -0.4458  
29 H -0.0807 -3.9677 1.9072  
30 H 1.6539 -4.2591 1.6118  
31 H 1.0875 -2.6351 2.0936  
32 H -0.5263 -4.9781 -0.2797  
33 H -0.0479 -4.1709 -1.7932  
34 H 1.1606 -5.0785 -0.8422  
35 C 0.3752 6.1055 -0.0474  
36 H 0.8555 5.9828 -1.0306  
37 H -0.0049 7.1360 0.0267  
38 H 1.1369 5.9598 0.7342

<sup>3</sup>1

Atom X Y Z

1 C -1.2831 0.5983 0.6766  
2 C -0.6177 1.6122 -0.1333  
3 H -0.1142 1.3585 -1.0727  
4 C -0.4892 -0.0917 1.7477  
5 H -0.1349 0.6453 2.4940  
6 H -1.0877 -0.8544 2.2647  
7 H 0.4188 -0.5664 1.3325  
8 C -0.6305 3.0063 0.2748  
9 O -1.1824 3.4315 1.2859  
10 O 0.0387 3.7984 -0.5976  
11 C 0.0688 5.2073 -0.2762  
12 H -0.9664 5.5768 -0.2015  
13 H 0.5398 5.3367 0.7114

14 B -2.7899 0.3510 0.4980  
15 O -3.5552 0.9927 -0.4507  
16 O -3.5097 -0.5231 1.2817  
17 C -4.9537 0.6994 -0.1394  
18 C -4.8415 -0.6351 0.6856  
19 C -5.4712 1.8781 0.6878  
20 C -5.7289 0.5830 -1.4441  
21 C -4.8231 -1.8873 -0.1929  
22 C -5.8620 -0.7836 1.8053  
23 H -4.9228 1.9714 1.6367  
24 H -5.3241 2.8057 0.1154  
25 H -6.5432 1.7734 0.9099  
26 H -5.2722 -0.1482 -2.1234  
27 H -6.7690 0.2801 -1.2482  
28 H -5.7484 1.5589 -1.9518  
29 H -4.5314 -2.7505 0.4232  
30 H -5.8140 -2.0890 -0.6252  
31 H -4.0964 -1.7892 -1.0128  
32 H -5.7045 -1.7399 2.3262  
33 H -5.7766 0.0263 2.5411  
34 H -6.8843 -0.7823 1.3970  
35 C 0.8447 5.9051 -1.3724  
36 H 0.3593 5.7601 -2.3501  
37 H 0.8921 6.9854 -1.1655  
38 H 1.8738 5.5180 -1.4324

## **2<sub>E</sub>**

Atom X Y Z

1 C -0.9746 0.2685 -0.0741  
2 C -0.4207 1.5030 0.0271  
3 H 0.6621 1.6008 0.1047  
4 C -2.4594 0.0243 -0.1241  
5 H -3.0089 0.9545 -0.2889  
6 H -2.7018 -0.7076 -0.9099

7 H -2.8035 -0.4092 0.8306  
8 C -1.1302 2.7940 0.0585  
9 O -2.3335 3.0040 0.0179  
10 O -0.2255 3.7996 0.1446  
11 C -0.7641 5.1406 0.1852  
12 H -1.3605 5.3115 -0.7249  
13 H -1.4432 5.2247 1.0484  
14 C 0.4065 6.0948 0.2862  
15 H 1.0743 5.9907 -0.5831  
16 H 0.0393 7.1322 0.3190  
17 H 0.9905 5.9047 1.2001  
18 C -0.0933 -0.9280 -0.1196  
19 C -0.5577 -2.1754 0.3411  
20 C 1.2187 -0.8587 -0.6303  
21 C 0.2672 -3.3018 0.3211  
22 H -1.5684 -2.2675 0.7385  
23 C 2.0390 -1.9858 -0.6594  
24 H 1.5923 0.0821 -1.0361  
25 C 1.5694 -3.2131 -0.1784  
26 H -0.1122 -4.2542 0.6966  
27 H 3.0481 -1.9080 -1.0692  
28 H 2.2118 -4.0955 -0.2017

## **2<sub>Z</sub>**

Atom X Y Z

1 C -1.1610 0.4306 -0.0602  
2 C -0.5047 1.6113 -0.0649  
3 H 0.5625 1.6204 -0.2948  
4 C -0.4323 -0.8409 -0.4052  
5 H 0.6194 -0.6553 -0.6630  
6 H -0.4790 -1.5468 0.4411  
7 H -0.9213 -1.3453 -1.2553  
8 C -1.0969 2.9451 0.1587  
9 O -2.2707 3.2258 0.3256

10 O -0.1176 3.8824 0.1301  
11 C -0.5430 5.2513 0.3170  
12 H -1.2649 5.5100 -0.4737  
13 H -1.0656 5.3321 1.2833  
14 C 0.6947 6.1210 0.2644  
15 H 1.2032 6.0221 -0.7073  
16 H 0.4147 7.1766 0.4032  
17 H 1.4040 5.8430 1.0595  
18 C -2.5951 0.2606 0.3032  
19 C -3.0583 0.6153 1.5805  
20 C -3.4912 -0.3291 -0.6026  
21 C -4.3872 0.3912 1.9410  
22 H -2.3659 1.0653 2.2931  
23 C -4.8277 -0.5347 -0.2487  
24 H -3.1471 -0.6116 -1.5996  
25 C -5.2788 -0.1796 1.0255  
26 H -4.7303 0.6663 2.9406  
27 H -5.5161 -0.9791 -0.9706  
28 H -6.3203 -0.3494 1.3063

**<sup>3</sup>2**

Atom X Y Z

1 C -1.4305 0.4930 -0.0738  
2 C -0.6984 1.6479 0.4576  
3 H -0.0136 1.5509 1.3075  
4 C -0.7818 -0.2707 -1.1972  
5 H 0.2664 0.0311 -1.3303  
6 H -0.8050 -1.3591 -1.0206  
7 H -1.3049 -0.0841 -2.1537  
8 C -0.8043 2.9526 -0.1787  
9 O -1.4943 3.1960 -1.1622  
10 O -0.0419 3.8801 0.4482  
11 C -0.0828 5.2130 -0.1106  
12 H 0.2488 5.1675 -1.1603

13 H -1.1259 5.5674 -0.1066  
14 C 0.8192 6.0864 0.7343  
15 H 1.8546 5.7122 0.7192  
16 H 0.8162 7.1146 0.3409  
17 H 0.4725 6.1137 1.7790  
18 C -2.7241 0.1574 0.4262  
19 C -3.3226 0.9110 1.4790  
20 C -3.4746 -0.9318 -0.1055  
21 C -4.5826 0.5906 1.9677  
22 H -2.7740 1.7528 1.9068  
23 C -4.7356 -1.2421 0.3912  
24 H -3.0588 -1.5296 -0.9168  
25 C -5.3020 -0.4883 1.4301  
26 H -5.0149 1.1849 2.7757  
27 H -5.2893 -2.0814 -0.0355  
28 H -6.2923 -0.7376 1.8155

### **3<sub>E</sub>**

Atom X Y Z

1 C -1.1078 0.7335 -0.0523  
2 C -0.3849 1.8793 -0.1441  
3 B -2.6371 0.5617 0.0860  
4 O -3.1922 -0.6945 0.2110  
5 O -3.5889 1.5605 0.1001  
6 C -4.6412 -0.5548 0.0971  
7 C -4.8638 0.9535 0.4791  
8 C -4.9995 -0.8683 -1.3572  
9 C -5.3015 -1.5579 1.0335  
10 C -5.0260 1.1791 1.9835  
11 C -5.9788 1.6528 -0.2861  
12 H -4.5363 -0.1478 -2.0472  
13 H -4.6255 -1.8720 -1.6077  
14 H -6.0879 -0.8550 -1.5147  
15 H -4.9328 -1.4561 2.0622

16 H -6.3940 -1.4226 1.0360  
17 H -5.0862 -2.5812 0.6911  
18 H -4.9644 2.2575 2.1911  
19 H -5.9993 0.8126 2.3414  
20 H -4.2308 0.6743 2.5516  
21 H -6.0534 2.7003 0.0425  
22 H -5.7950 1.6450 -1.3681  
23 H -6.9459 1.1651 -0.0896  
24 H -0.5462 -0.2074 -0.0634  
25 C -1.0219 3.2456 -0.0736  
26 H -0.7373 3.7581 0.8613  
27 H -0.6705 3.8847 -0.8999  
28 H -2.1138 3.1792 -0.1019  
29 C 1.0959 1.8447 -0.3028  
30 C 1.8950 2.9243 0.1218  
31 C 1.7455 0.7421 -0.8946  
32 C 3.2854 2.8899 -0.0091  
33 H 1.4309 3.7989 0.5777  
34 C 3.1326 0.7103 -1.0342  
35 H 1.1529 -0.0914 -1.2740  
36 C 3.9124 1.7829 -0.5868  
37 H 3.8807 3.7359 0.3410  
38 H 3.6078 -0.1533 -1.5044  
39 H 4.9984 1.7587 -0.6967

### **3<sub>Z</sub>**

Atom X Y Z

1 C -1.1235 0.6643 0.7557  
2 C -0.3910 1.7004 0.2843  
3 B -2.6593 0.4809 0.7046  
4 O -3.5131 1.0907 -0.1857  
5 O -3.3107 -0.3869 1.5556  
6 C -4.8765 0.8081 0.2512  
7 C -4.6920 -0.5068 1.0919

8 C -5.3257 2.0057 1.0917  
9 C -5.7607 0.6650 -0.9799  
10 C -4.7613 -1.7789 0.2450  
11 C -5.6041 -0.6259 2.3051  
12 H -4.7055 2.1174 1.9931  
13 H -5.2199 2.9207 0.4911  
14 H -6.3771 1.9087 1.3995  
15 H -5.3626 -0.0801 -1.6806  
16 H -6.7802 0.3671 -0.6904  
17 H -5.8234 1.6304 -1.5041  
18 H -4.4179 -2.6304 0.8510  
19 H -5.7891 -1.9837 -0.0888  
20 H -4.1132 -1.7041 -0.6405  
21 H -5.4010 -1.5706 2.8316  
22 H -5.4496 0.2001 3.0111  
23 H -6.6601 -0.6298 1.9938  
24 H -0.5555 -0.1620 1.2022  
25 C 1.1169 1.6884 0.3132  
26 H 1.5307 1.7937 -0.7041  
27 H 1.5017 2.5447 0.8930  
28 H 1.5051 0.7571 0.7489  
29 C -1.0128 2.9417 -0.2571  
30 C -0.6332 3.4562 -1.5090  
31 C -1.9718 3.6451 0.4912  
32 C -1.2192 4.6210 -2.0111  
33 H 0.1112 2.9285 -2.1085  
34 C -2.5487 4.8161 -0.0024  
35 H -2.2575 3.2697 1.4747  
36 C -2.1788 5.3063 -1.2593  
37 H -0.9234 4.9951 -2.9936  
38 H -3.2900 5.3484 0.5975  
39 H -2.6315 6.2207 -1.6483

Atom X Y Z

1 C -0.9863 0.3824 1.4503  
2 C -0.1331 1.5713 1.3265  
3 B -2.4102 0.3215 0.8796  
4 O -3.2382 -0.7741 0.9955  
5 O -2.9803 1.3620 0.1789  
6 C -4.3803 -0.5426 0.1107  
7 C -4.3873 1.0241 -0.0271  
8 C -4.0661 -1.2613 -1.2030  
9 C -5.6244 -1.1351 0.7578  
10 C -5.1726 1.7245 1.0836  
11 C -4.8159 1.5453 -1.3919  
12 H -3.1732 -0.8375 -1.6860  
13 H -3.8706 -2.3227 -0.9909  
14 H -4.9089 -1.1978 -1.9068  
15 H -5.7770 -0.7477 1.7733  
16 H -6.5174 -0.9065 0.1559  
17 H -5.5255 -2.2293 0.8181  
18 H -4.9566 2.8023 1.0465  
19 H -6.2563 1.5835 0.9595  
20 H -4.8816 1.3502 2.0761  
21 H -4.7851 2.6451 -1.3947  
22 H -4.1557 1.1819 -2.1898  
23 H -5.8470 1.2327 -1.6177  
24 H -0.5856 -0.4858 1.9947  
25 C -0.1966 2.5877 2.4374  
26 H 0.8011 2.7832 2.8698  
27 H -0.5827 3.5579 2.0740  
28 H -0.8554 2.2484 3.2487  
29 C 0.6875 1.7771 0.1768  
30 C 1.5051 2.9369 0.0310  
31 C 0.7141 0.8259 -0.8870  
32 C 2.2907 3.1237 -1.1012  
33 H 1.5160 3.6926 0.8169



34 C 1.5040 1.0230 -2.0123  
35 H 0.0982 -0.0723 -0.8061  
36 C 2.3005 2.1730 -2.1332  
37 H 2.9062 4.0225 -1.1851  
38 H 1.5020 0.2760 -2.8097  
39 H 2.9191 2.3262 -3.0195

#### **4<sub>E</sub>**

Atom X Y Z

1 C -0.9448 0.2529 0.2369  
2 C -0.4205 1.4948 0.0741  
3 H 0.6265 1.6075 -0.2047  
4 C -2.3937 0.0096 0.5674  
5 H -2.9117 -0.4326 -0.3004  
6 H -2.4839 -0.7129 1.3930  
7 H -2.9009 0.9416 0.8274  
8 C -1.1208 2.7836 0.2159  
9 O -2.2894 2.9919 0.5071  
10 O -0.2500 3.7925 -0.0322  
11 C -0.7818 5.1331 0.0654  
12 H -1.6204 5.2350 -0.6416  
13 H -1.1827 5.2831 1.0803  
14 C 0.3472 6.0911 -0.2484  
15 H 0.7354 5.9212 -1.2647  
16 H -0.0162 7.1283 -0.1850  
17 H 1.1756 5.9696 0.4668  
18 C -0.0792 -0.9420 0.0654  
19 C 1.3462 -0.8539 0.1627  
20 C -0.6387 -2.1871 -0.1924  
21 C 2.1448 -1.9585 -0.0098  
22 H 1.8116 0.1008 0.4067  
23 C 0.1593 -3.3453 -0.3866  
24 H -1.7198 -2.3018 -0.2711  
25 C 1.5847 -3.2356 -0.2960

26 C -0.4171 -4.6160 -0.6669  
27 C 2.3811 -4.3965 -0.4850  
28 C 0.3815 -5.7261 -0.8477  
29 H -1.5043 -4.6969 -0.7361  
30 C 1.7930 -5.6156 -0.7559  
31 H -0.0705 -6.6964 -1.0624  
32 H 3.2296 -1.8681 0.0814  
33 H 3.4675 -4.3077 -0.4132  
34 H 2.4135 -6.5022 -0.9012

#### 4z

Atom X Y Z

1 C -1.2388 0.5652 -0.1798  
2 C -0.4930 1.6906 -0.1156  
3 H 0.5704 1.6328 -0.3549  
4 C -0.6096 -0.7316 -0.6150  
5 H 0.4531 -0.6087 -0.8650  
6 H -0.7101 -1.4894 0.1799  
7 H -1.1348 -1.1362 -1.4963  
8 C -0.9833 3.0476 0.1923  
9 O -2.1339 3.3997 0.3867  
10 O 0.0598 3.9128 0.2103  
11 C -0.2660 5.2953 0.4802  
12 H -0.9783 5.6478 -0.2825  
13 H -0.7689 5.3571 1.4583  
14 C 1.0290 6.0784 0.4552  
15 H 1.5164 5.9999 -0.5291  
16 H 0.8257 7.1413 0.6575  
17 H 1.7274 5.7071 1.2213  
18 C -2.6786 0.4829 0.1900  
19 C -3.1081 0.8519 1.4988  
20 C -3.6068 -0.0222 -0.7037  
21 C -4.4235 0.7153 1.8747  
22 H -2.3725 1.2362 2.2056

23 C -4.9789 -0.1502 -0.3553  
24 H -3.2997 -0.3144 -1.7103  
25 C -5.3995 0.2207 0.9638  
26 C -5.9470 -0.6444 -1.2734  
27 C -6.7697 0.0803 1.3153  
28 C -7.2704 -0.7672 -0.9039  
29 H -5.6230 -0.9258 -2.2782  
30 C -7.6857 -0.4018 0.4027  
31 H -8.0047 -1.1472 -1.6169  
32 H -4.7378 0.9916 2.8839  
33 H -7.0857 0.3628 2.3224  
34 H -8.7361 -0.5038 0.6830

<sup>3</sup>4'

Atom X Y Z

1 C -0.9519 0.2117 0.0096  
2 C -0.3982 1.5464 0.0028  
3 H 0.6741 1.6713 -0.1277  
4 C -2.4395 0.0029 0.1686  
5 H -2.8596 -0.5354 -0.6979  
6 H -2.6623 -0.6088 1.0592  
7 H -2.9580 0.9596 0.2677  
8 C -1.0990 2.8030 0.1537  
9 O -2.3037 3.0003 0.3211  
10 O -0.2077 3.8379 0.0862  
11 C -0.7641 5.1597 0.2220  
12 H -1.5172 5.3166 -0.5675  
13 H -1.2842 5.2341 1.1911  
14 C 0.3798 6.1462 0.1169  
15 H 0.8867 6.0569 -0.8567  
16 H -0.0023 7.1740 0.2159  
17 H 1.1212 5.9736 0.9127  
18 C -0.1086 -0.8974 -0.1332  
19 C 1.3325 -0.8055 -0.2910

20 C -0.6569 -2.2568 -0.1301  
21 C 2.1155 -1.9086 -0.4275  
22 H 1.8118 0.1713 -0.3016  
23 C 0.1457 -3.3953 -0.2704  
24 H -1.7302 -2.3972 -0.0150  
25 C 1.5704 -3.2505 -0.4248  
26 C -0.4045 -4.7141 -0.2656  
27 C 2.3684 -4.3853 -0.5645  
28 C 0.4132 -5.8273 -0.4064  
29 H -1.4840 -4.8318 -0.1487  
30 C 1.8019 -5.6722 -0.5567  
31 H -0.0243 -6.8274 -0.4005  
32 H 3.1959 -1.7953 -0.5441  
33 H 3.4481 -4.2667 -0.6812  
34 H 2.4424 -6.5487 -0.6672

<sup>3</sup>4

Atom X Y Z

1 C -1.5684 0.8157 -0.3571  
2 C -0.7032 1.7853 0.3250  
3 H -0.0545 1.4879 1.1565  
4 C -0.9943 0.1284 -1.5672  
5 H 0.0946 0.2658 -1.6237  
6 H -1.2040 -0.9537 -1.5626  
7 H -1.4289 0.5434 -2.4958  
8 C -0.6187 3.1621 -0.1394  
9 O -1.2476 3.6188 -1.0872  
10 O 0.2461 3.8906 0.6059  
11 C 0.3975 5.2767 0.2228  
12 H 0.7473 5.3195 -0.8211  
13 H -0.5889 5.7657 0.2635  
14 C 1.3856 5.9061 1.1807  
15 H 2.3617 5.3993 1.1271  
16 H 1.5306 6.9663 0.9221

17 H 1.0184 5.8489 2.2172  
18 C -2.9020 0.5921 0.0805  
19 C -3.4205 1.2870 1.2361  
20 C -3.7710 -0.2966 -0.5870  
21 C -4.7008 1.0905 1.6750  
22 H -2.7658 1.9812 1.7669  
23 C -5.0991 -0.5130 -0.1493  
24 H -3.4279 -0.8373 -1.4698  
25 C -5.5869 0.1884 1.0052  
26 C -5.9771 -1.4111 -0.8227  
27 C -6.9161 -0.0323 1.4386  
28 C -7.2690 -1.6056 -0.3764  
29 H -5.6082 -1.9454 -1.7015  
30 C -7.7453 -0.9119 0.7636  
31 H -7.9301 -2.2973 -0.9026  
32 H -5.0680 1.6276 2.5529  
33 H -7.2792 0.5051 2.3180  
34 H -8.7687 -1.0735 1.1077

## **TX**

Atom X Y Z

1 C -9.1456 -0.3853 0.0081  
2 C -7.7590 -0.4653 0.0198  
3 C -6.9823 0.7096 0.0147  
4 C -7.6078 1.9733 -0.0023  
5 C -9.0183 2.0233 -0.0139  
6 C -9.7835 0.8671 -0.0089  
7 C -6.8786 3.2651 -0.0089  
8 C -5.3952 3.2740 0.0032  
9 C -4.5954 2.1128 0.0206  
10 C -3.1911 2.2199 0.0308  
11 H -2.5813 1.3143 0.0441  
12 C -2.5864 3.4703 0.0239  
13 C -3.3703 4.6369 0.0067

14 C -4.7527 4.5307 -0.0034  
15 H -9.7364 -1.3034 0.0123  
16 H -7.2646 -1.4387 0.0330  
17 H -9.4816 3.0098 -0.0271  
18 H -10.8730 0.9285 -0.0180  
19 H -1.4969 3.5397 0.0319  
20 H -2.8940 5.6187 0.0014  
21 H -5.3890 5.4156 -0.0168  
22 S -5.2359 0.4706 0.0310  
23 O -7.5043 4.3295 -0.0246

### **<sup>3</sup>TX**

Atom X Y Z

1 C -9.1421 -0.4126 0.0085  
2 C -7.7501 -0.4704 0.0200  
3 C -6.9987 0.7167 0.0145  
4 C -7.6118 2.0132 -0.0029  
5 C -9.0257 2.0266 -0.0142  
6 C -9.7680 0.8485 -0.0086  
7 C -6.8795 3.2666 -0.0092  
8 C -5.4282 3.2970 0.0026  
9 C -4.5936 2.1306 0.0203  
10 C -3.1909 2.2096 0.0307  
11 H -2.6015 1.2906 0.0440  
12 C -2.5643 3.4539 0.0242  
13 C -3.3616 4.6142 0.0071  
14 C -4.7520 4.5388 -0.0034  
15 H -9.7313 -1.3294 0.0127  
16 H -7.2340 -1.4324 0.0334  
17 H -9.5138 2.9999 -0.0274  
18 H -10.8587 0.9068 -0.0177  
19 H -1.4766 3.5227 0.0322  
20 H -2.8821 5.5957 0.0019  
21 H -5.3645 5.4390 -0.0165

22 S -5.2609 0.5132 0.0304  
23 O -7.5333 4.3783 -0.0251

### **Ir-A**

Atom X Y Z

1 N -1.8879 -1.0683 0.2227  
2 H 0.7437 -3.7588 3.6816  
3 H -0.6975 3.7488 3.5577  
4 H 4.0151 -1.0898 2.8483  
5 H -4.0120 1.0518 3.0473  
6 H 3.0908 -3.0194 4.0970  
7 H -3.0145 3.0339 4.1487  
8 H 0.6115 2.4978 1.8778  
9 H -0.6683 -2.5842 2.0307  
10 H 4.6501 0.6128 1.7193  
11 H -4.7132 -0.7022 2.0398  
12 H -5.3469 -2.7265 0.7365  
13 H 3.4487 3.4467 -1.3109  
14 H -3.6929 -3.6753 -0.9226  
15 H 1.2308 2.3023 -1.3819  
16 H -1.4857 -2.5371 -1.1822  
17 C 0.3556 -2.2426 2.1936  
18 C -0.4002 2.1660 2.1188  
19 C 2.1884 -0.7395 1.7214  
20 C -2.2573 0.6468 1.8285  
21 C 1.1531 -2.9094 3.1290  
22 C -1.1393 2.8760 3.0702  
23 C 2.9883 -1.4105 2.6623  
24 C -2.9987 1.3616 2.7848  
25 C 2.4716 -2.4965 3.3660  
26 C -2.4407 2.4772 3.4058  
27 C 2.6498 0.4076 0.9378  
28 C -2.7646 -0.5346 1.1284  
29 C 3.9132 1.0084 1.0220

30 C -4.0193 -1.1299 1.3178  
31 C -4.3715 -2.2605 0.5893  
32 C 3.2539 2.5914 -0.6649  
33 C -3.4609 -2.7906 -0.3306  
34 C 2.0184 1.9608 -0.7128  
35 C -2.2321 -2.1638 -0.4835  
36 Ir -0.0885 -0.0856 0.0439  
37 C 4.2194 2.1031 0.2216  
38 H 5.2016 2.5734 0.2871  
39 C -0.9379 1.0406 1.4708  
40 C 1.4649 -2.2732 -1.6360  
41 C 0.2417 -0.7279 -2.8689  
42 C -0.6183 0.4229 -2.8660  
43 C -1.0909 0.9535 -4.0902  
44 C -0.6893 0.3316 -5.3215  
45 C 0.1385 -0.7545 -5.3248  
46 C 0.6291 -1.3161 -4.0967  
47 C 1.4869 -2.4387 -4.0392  
48 C 1.9053 -2.9117 -2.8087  
49 H 2.5682 -3.7729 -2.7289  
50 H 1.8096 -2.9186 -4.9645  
51 H -1.0604 0.7502 -6.2582  
52 H 0.4417 -1.2190 -6.2641  
53 C -1.7501 2.0300 -1.6250  
54 C -1.9405 2.0820 -4.0260  
55 H -2.3265 2.5194 -4.9480  
56 C -2.2705 2.6148 -2.7930  
57 H -2.9245 3.4822 -2.7081  
58 N -0.9427 0.9695 -1.6576  
59 N 0.6524 -1.2163 -1.6619  
60 H 1.7675 -2.6211 -0.6479  
61 H -1.9826 2.4255 -0.6358  
62 C 0.8503 -1.1480 1.4636  
63 N 1.7184 0.9006 0.0641



### <sup>3</sup>Ir-A

Atom X Y Z

1 N -1.8819 -1.0789 0.2736  
2 H 0.8629 -3.9040 3.5626  
3 H -0.8208 3.8888 3.4348  
4 H 4.1027 -1.1845 2.7387  
5 H -4.1052 1.1435 2.9390  
6 H 3.2119 -3.1597 3.9283  
7 H -3.1431 3.1692 3.9784  
8 H 0.5472 2.5840 1.8352  
9 H -0.6048 -2.6754 1.9919  
10 H 4.7307 0.5305 1.5831  
11 H -4.8049 -0.6209 1.9027  
12 H -5.3805 -2.6778 0.6197  
13 H 3.3992 3.4538 -1.3049  
14 H -3.6479 -3.6848 -0.9138  
15 H 1.1538 2.3363 -1.2761  
16 H -1.4049 -2.5736 -1.0737  
17 C 0.4201 -2.3372 2.1478  
18 C -0.4661 2.2566 2.0700  
19 C 2.2511 -0.7952 1.6745  
20 C -2.3229 0.6998 1.7823  
21 C 1.2445 -3.0310 3.0298  
22 C -1.2346 2.9931 2.9677  
23 C 3.0721 -1.4956 2.5641  
24 C -3.0875 1.4433 2.6871  
25 C 2.5689 -2.6111 3.2383  
26 C -2.5437 2.5874 3.2765  
27 C 2.6858 0.3785 0.9128  
28 C -2.8035 -0.5070 1.1047  
29 C 3.9594 0.9552 0.9430  
30 C -4.0731 -1.0779 1.2388  
31 C -4.3928 -2.2265 0.5195

32 C 3.2265 2.5880 -0.6668  
33 C -3.4375 -2.7893 -0.3305  
34 C 1.9772 1.9785 -0.6608  
35 C -2.1903 -2.1835 -0.4290  
36 Ir -0.0855 -0.0857 0.1473  
37 C 4.2323 2.0675 0.1512  
38 H 5.2229 2.5232 0.1704  
39 C -0.9828 1.0915 1.4639  
40 C 1.4931 -2.2739 -1.5441  
41 C 0.2343 -0.7115 -2.7817  
42 C -0.6039 0.4110 -2.7783  
43 C -1.0951 0.9680 -4.0037  
44 C -0.6820 0.3368 -5.2334  
45 C 0.1436 -0.7486 -5.2371  
46 C 0.6420 -1.3235 -4.0114  
47 C 1.4932 -2.4261 -3.9578  
48 C 1.9287 -2.9037 -2.7000  
49 H 2.5975 -3.7603 -2.6210  
50 H 1.8175 -2.9078 -4.8819  
51 H -1.0494 0.7543 -6.1734  
52 H 0.4460 -1.2090 -6.1802  
53 C -1.7747 2.0316 -1.5295  
54 C -1.9402 2.0748 -3.9418  
55 H -2.3268 2.5155 -4.8625  
56 C -2.2879 2.6105 -2.6802  
57 H -2.9493 3.4722 -2.5945  
58 N -0.9411 0.9672 -1.5477  
59 N 0.6563 -1.2118 -1.5533  
60 H 1.8061 -2.6251 -0.5607  
61 H -2.0197 2.4278 -0.5439  
62 C 0.8951 -1.2014 1.4573  
63 N 1.7141 0.9099 0.1125

**Ir-B**

Atom X Y Z

1 N 0.8061 -1.0838 -1.6597  
2 N 1.0369 -1.0842 1.5244  
3 N -1.8363 -1.0857 0.1327  
4 H 0.6275 -0.8545 -5.0270  
5 H -0.6425 0.8107 -4.9966  
6 H 2.1149 -2.8385 -4.8519  
7 H 2.7650 -3.6807 -2.5589  
8 H -2.7323 3.6871 -2.5766  
9 H 1.8687 -2.4723 -0.5557  
10 H -1.8930 2.5957 -0.5237  
11 H 0.8394 -3.6863 3.6642  
12 H -0.8674 3.6909 3.6499  
13 H 4.0363 -0.8459 3.0638  
14 H -4.0094 0.8170 3.0449  
15 H 3.1448 -2.8359 4.2574  
16 H -3.1329 2.8057 4.2278  
17 H 0.4957 2.5941 1.9036  
18 H -0.4461 -2.4794 1.8846  
19 H 4.6405 0.8262 1.9562  
20 H -4.6675 -0.8513 1.9637  
21 H -5.2567 -2.8386 0.5918  
22 H 3.5899 3.7016 -1.0646  
23 H -3.5922 -3.6853 -1.1119  
24 H 1.3996 2.5990 -1.3771  
25 H -1.4088 -2.4778 -1.3356  
26 C 0.4452 -0.6051 -2.8856  
27 C -0.4321 0.5711 -2.8449  
28 C 0.9152 -1.2366 -4.0486  
29 C -0.9120 1.1959 -4.0109  
30 C 1.7484 -2.3458 -3.9498  
31 C 2.1114 -2.8174 -2.6834  
32 C -2.0847 2.8094 -2.6561  
33 C 1.6176 -2.1524 -1.5674

34 C -1.6103 2.1902 -1.4972  
35 C 0.5532 -2.1560 2.1772  
36 C -0.4903 2.1907 2.1426  
37 C 2.2760 -0.6010 1.8297  
38 C -2.2472 0.5730 1.7931  
39 C 1.2722 -2.8202 3.1638  
40 C -1.2594 2.8128 3.1289  
41 C 3.0474 -1.2314 2.8197  
42 C -3.0197 1.2006 2.7879  
43 C 2.5473 -2.3440 3.4879  
44 C -2.5312 2.3203 3.4568  
45 C 2.6775 0.5779 1.0526  
46 C -2.7197 -0.6046 1.0548  
47 C 3.9233 1.2087 1.2269  
48 C -3.9624 -1.2354 1.2279  
49 C -4.2918 -2.3464 0.4590  
50 C 3.3364 2.8216 -0.4666  
51 C -3.3744 -2.8206 -0.4853  
52 C 2.0997 2.1963 -0.6425  
53 C -2.1607 -2.1560 -0.6146  
54 Ir 0.0018 0.0262 -0.0007  
55 C 1.7233 1.0615 0.1061  
56 C -0.7705 1.0579 -1.5454  
57 C 4.2562 2.3304 0.4716  
58 C -1.7369 2.3146 -3.9217  
59 H 5.2232 2.8183 0.6094  
60 H -2.1077 2.7975 -4.8280  
61 C -0.9514 1.0583 1.4393

### **<sup>3</sup>Ir-B**

Atom X Y Z

1 N 0.7818 -1.0846 -1.6258  
2 N 1.0091 -1.0610 1.5372  
3 N -1.8318 -1.1015 0.1267

4 H 0.6189 -0.8459 -5.0470  
5 H -0.5463 0.9564 -5.0150  
6 H 2.0900 -2.8298 -4.8665  
7 H 2.7534 -3.6660 -2.5458  
8 H -2.7285 3.7381 -2.5360  
9 H 1.8507 -2.4815 -0.5474  
10 H -1.9306 2.5809 -0.4783  
11 H 0.7689 -3.5968 3.7471  
12 H -0.9286 3.6846 3.6662  
13 H 4.0216 -0.8432 3.0497  
14 H -4.0259 0.7655 3.0485  
15 H 3.0960 -2.7815 4.3001  
16 H -3.1776 2.7593 4.2398  
17 H 0.4475 2.6226 1.9043  
18 H -0.5024 -2.4146 1.9433  
19 H 4.6532 0.7807 1.8916  
20 H -4.6419 -0.9350 1.9922  
21 H -5.1888 -2.9416 0.6349  
22 H 3.6409 3.6154 -1.1804  
23 H -3.5251 -3.7537 -1.0835  
24 H 1.4164 2.5619 -1.4413  
25 H -1.3683 -2.4857 -1.3341  
26 C 0.4308 -0.5636 -2.8943  
27 C -0.3743 0.5951 -2.8580  
28 C 0.9115 -1.2268 -4.0679  
29 C -0.8396 1.2925 -4.0192  
30 C 1.7270 -2.3262 -3.9690  
31 C 2.0979 -2.8047 -2.6714  
32 C -2.0766 2.8656 -2.6080  
33 C 1.5972 -2.1459 -1.5553  
34 C -1.6282 2.2113 -1.4598  
35 C 0.5042 -2.1020 2.2212  
36 C -0.5311 2.2024 2.1453  
37 C 2.2568 -0.5937 1.8224

38 C -2.2641 0.5581 1.7887  
39 C 1.2159 -2.7537 3.2209  
40 C -1.3071 2.8043 3.1396  
41 C 3.0232 -1.2135 2.8224  
42 C -3.0435 1.1658 2.7905  
43 C 2.5035 -2.2969 3.5224  
44 C -2.5697 2.2887 3.4646  
45 C 2.6742 0.5627 1.0198  
46 C -2.7134 -0.6342 1.0571  
47 C 3.9368 1.1660 1.1639  
48 C -3.9352 -1.2999 1.2487  
49 C -4.2398 -2.4233 0.4879  
50 C 3.3728 2.7558 -0.5606  
51 C -3.3216 -2.8798 -0.4651  
52 C 2.1193 2.1587 -0.7103  
53 C -2.1277 -2.1856 -0.6115  
54 Ir -0.0150 0.0596 -0.0240  
55 C 1.7290 1.0531 0.0714  
56 C -0.7727 1.0950 -1.5202  
57 C 4.2883 2.2614 0.3792  
58 C -1.6644 2.3903 -3.8875  
59 H 5.2683 2.7275 0.4966  
60 H -2.0112 2.9079 -4.7860  
61 C -0.9816 1.0729 1.4367

### **Ir-C**

Atom X Y Z

1 N 0.8007 -1.0918 -1.6595  
2 N 1.0393 -1.0919 1.5207  
3 N -1.8351 -1.0938 0.1377  
4 H 0.6281 -0.8532 -5.0267  
5 H -0.6292 0.8315 -4.9926  
6 H 2.1039 -2.8449 -4.8537  
7 H 2.7464 -3.6968 -2.5622

8 H 1.8537 -2.4892 -0.5571  
9 H -1.8966 2.6131 -0.5183  
10 H 0.8530 -3.7022 3.6509  
11 H 4.0388 -0.8477 3.0595  
12 H -4.0118 0.8357 3.0350  
13 H 3.1552 -2.8444 4.2456  
14 H -3.1185 2.8489 4.2059  
15 H 0.5001 2.6130 1.9020  
16 H -0.4381 -2.4947 1.8759  
17 H 4.6331 0.8438 1.9597  
18 H -4.6668 -0.8531 1.9675  
19 H -5.2523 -2.8479 0.6067  
20 H -3.5872 -3.7022 -1.0924  
21 H 1.3932 2.6175 -1.3806  
22 H -1.4052 -2.4937 -1.3228  
23 C 0.4442 -0.6077 -2.8845  
24 C -0.4260 0.5723 -2.8421  
25 C 0.9122 -1.2388 -4.0486  
26 C -0.8973 1.2081 -4.0040  
27 C 1.7390 -2.3525 -3.9508  
28 C 2.0978 -2.8297 -2.6851  
29 C -2.0453 2.7961 -2.6449  
30 C 1.6062 -2.1653 -1.5682  
31 C -1.5978 2.1903 -1.4783  
32 C 0.5597 -2.1682 2.1696  
33 C -0.4814 2.1912 2.1217  
34 C 2.2766 -0.6046 1.8271  
35 C -2.2485 0.5735 1.7877  
36 C 1.2818 -2.8326 3.1533  
37 C -1.2696 2.7989 3.0900  
38 C 3.0511 -1.2355 2.8143  
39 C -3.0209 1.2113 2.7743  
40 C 2.5553 -2.3521 3.4783  
41 C -2.5385 2.3366 3.4381

42 C 2.6725 0.5778 1.0548  
43 C -2.7190 -0.6081 1.0570  
44 C 3.9113 1.2184 1.2318  
45 C -3.9609 -1.2396 1.2338  
46 C -4.2882 -2.3551 0.4710  
47 C 3.3062 2.8067 -0.4410  
48 C -3.3704 -2.8336 -0.4708  
49 C 2.0750 2.1962 -0.6410  
50 C -2.1577 -2.1687 -0.6039  
51 Ir 0.0009 0.0189 -0.0003  
52 C 1.7163 1.0583 0.1066  
53 C -0.7675 1.0549 -1.5403  
54 C 4.2428 2.3455 0.4837  
55 C -1.7147 2.3325 -3.9180  
56 H 5.1963 2.8599 0.6034  
57 H -2.0921 2.8431 -4.8040  
58 C -0.9499 1.0554 1.4340  
59 F -0.7866 3.8966 3.7310  
60 F 3.6174 3.9063 -1.1779  
61 F -2.8427 3.8932 -2.5468

### **<sup>3</sup>Ir-C**

Atom X Y Z

1 N 0.8401 -1.0716 -1.6119  
2 N 0.9851 -1.1089 1.4625  
3 N -1.8514 -1.0474 0.1576  
4 H 0.7194 -0.8797 -4.9820  
5 H -0.6091 0.7483 -4.9914  
6 H 2.2764 -2.8022 -4.7542  
7 H 2.9148 -3.5951 -2.4419  
8 H 1.9299 -2.4058 -0.4678  
9 H -2.0324 2.5319 -0.5651  
10 H 0.8383 -3.8572 3.4195  
11 H 4.0435 -0.9817 2.9566



12 H -3.9840 0.9261 3.1050  
13 H 3.1836 -3.0556 4.0114  
14 H -3.0446 2.9410 4.2092  
15 H 0.5414 2.6518 1.8565  
16 H -0.4780 -2.5471 1.7538  
17 H 4.5823 0.8874 2.0524  
18 H -4.6431 -0.8330 2.0875  
19 H -5.2812 -2.7847 0.6943  
20 H -3.6793 -3.5837 -1.1087  
21 H 1.4000 2.6186 -1.3828  
22 H -1.4910 -2.4041 -1.3612  
23 C 0.4903 -0.6140 -2.8460  
24 C -0.4210 0.5349 -2.8353  
25 C 1.0024 -1.2392 -3.9941  
26 C -0.9087 1.1271 -4.0134  
27 C 1.8744 -2.3142 -3.8649  
28 C 2.2315 -2.7589 -2.5871  
29 C -2.1602 2.6756 -2.6978  
30 C 1.6907 -2.1054 -1.4873  
31 C -1.7010 2.1106 -1.5143  
32 C 0.5251 -2.2393 2.0512  
33 C -0.4404 2.2506 2.1062  
34 C 2.2541 -0.6230 1.7939  
35 C -2.2570 0.6204 1.8070  
36 C 1.2608 -2.9603 2.9673  
37 C -1.2061 2.8745 3.0758  
38 C 3.0439 -1.3445 2.7162  
39 C -2.9969 1.2854 2.8124  
40 C 2.5668 -2.5007 3.3031  
41 C -2.4813 2.4111 3.4399  
42 C 2.6403 0.5851 1.1028  
43 C -2.7251 -0.5567 1.1145  
44 C 3.8758 1.2468 1.3024  
45 C -3.9660 -1.2002 1.3166

46 C -4.3232 -2.2869 0.5380  
47 C 3.3012 2.8227 -0.4092  
48 C -3.4336 -2.7392 -0.4655  
49 C 2.0728 2.2058 -0.6298  
50 C -2.2189 -2.0868 -0.6128  
51 Ir -0.0246 0.0655 0.0448  
52 C 1.7059 1.0893 0.1319  
53 C -0.8068 1.0273 -1.5552  
54 C 4.2088 2.3684 0.5514  
55 C -1.7826 2.2090 -3.9559  
56 H 5.1541 2.8933 0.6950  
57 H -2.1696 2.6864 -4.8560  
58 C -0.9439 1.1165 1.4356  
59 F -0.7186 3.9741 3.7072  
60 F 3.6301 3.9188 -1.1473  
61 F -3.0119 3.7287 -2.6282

### **Ir-D**

Atom X Y Z

1 N 0.8049 -1.0866 -1.6553  
2 N 1.0329 -1.0865 1.5226  
3 N -1.8338 -1.0889 0.1317  
4 H 0.6692 -0.8783 -5.0217  
5 H 2.1561 -2.8570 -4.8145  
6 H 2.7782 -3.6867 -2.5087  
7 H 1.8524 -2.4659 -0.5274  
8 H -1.9062 2.5759 -0.4816  
9 H 0.7898 -3.6905 3.6540  
10 H 4.0139 -0.8729 3.0919  
11 H 3.0947 -2.8555 4.2722  
12 H -3.0807 2.8462 4.2205  
13 H 0.5350 2.5773 1.8899  
14 H -0.4641 -2.4707 1.8618  
15 H -4.6818 -0.8806 1.9316

16 H -5.2441 -2.8615 0.5430  
17 H -3.5576 -3.6916 -1.1479  
18 H 1.3655 2.5799 -1.4076  
19 H -1.3802 -2.4693 -1.3386  
20 C 0.4568 -0.6119 -2.8886  
21 C -0.4233 0.5625 -2.8418  
22 C 0.9445 -1.2528 -4.0411  
23 C -0.9264 1.2353 -3.9663  
24 C 1.7782 -2.3604 -3.9193  
25 C 2.1257 -2.8251 -2.6482  
26 C -2.0751 2.7920 -2.6026  
27 C 1.6157 -2.1531 -1.5443  
28 C -1.6132 2.1718 -1.4503  
29 C 0.5334 -2.1553 2.1671  
30 C -0.4503 2.1730 2.1203  
31 C 2.2735 -0.6091 1.8398  
32 C -2.2493 0.5621 1.7864  
33 C 1.2351 -2.8269 3.1605  
34 C -1.2183 2.7938 3.0953  
35 C 3.0283 -1.2493 2.8384  
36 C -2.9725 1.2356 2.7832  
37 C 2.5080 -2.3593 3.4973  
38 C -2.4891 2.3503 3.4529  
39 C 2.6708 0.5673 1.0560  
40 C -2.7285 -0.6137 1.0489  
41 C 3.8939 1.2439 1.1853  
42 C -3.9699 -1.2554 1.2035  
43 C -4.2803 -2.3643 0.4220  
44 C 3.2849 2.8008 -0.4902  
45 C -3.3528 -2.8291 -0.5140  
46 C 2.0582 2.1770 -0.6691  
47 C -2.1424 -2.1562 -0.6252  
48 Ir 0.0004 0.0130 -0.0004  
49 C 1.7183 1.0494 0.0994

50 C -0.7748 1.0462 -1.5390  
51 C 4.2301 2.3595 0.4324  
52 C -1.7496 2.3489 -3.8821  
53 H 5.1892 2.8578 0.5620  
54 H -2.1196 2.8443 -4.7780  
55 C -0.9456 1.0465 1.4394  
56 F -0.7215 3.8806 3.7345  
57 F 3.5880 3.8886 -1.2394  
58 F -2.8784 3.8778 -2.4915  
59 F -4.2138 0.8102 3.1432  
60 F -0.6174 0.8102 -5.2214  
61 F 4.8262 0.8207 2.0815

**<sup>3</sup>Ir-D**

Atom X Y Z

1 N 0.8171 -1.0663 -1.6649  
2 N 1.0136 -1.0913 1.5253  
3 N -1.7761 -1.0958 0.1203  
4 H 0.6535 -0.8646 -5.0292  
5 H 2.1910 -2.8043 -4.8281  
6 H 2.8528 -3.6123 -2.5266  
7 H 1.9071 -2.4153 -0.5397  
8 H -1.9182 2.5752 -0.4728  
9 H 0.7356 -3.6976 3.6459  
10 H 3.9828 -0.8999 3.1158  
11 H 3.0390 -2.8767 4.2833  
12 H -3.0876 2.8921 4.1655  
13 H 0.5636 2.5814 1.8781  
14 H -0.4966 -2.4637 1.8390  
15 H -4.6509 -0.9430 2.0112  
16 H -5.2082 -2.9105 0.6180  
17 H -3.5355 -3.6750 -1.1589  
18 H 1.4167 2.5681 -1.4209  
19 H -1.3784 -2.4581 -1.3758

20 C 0.4506 -0.5999 -2.8945  
21 C -0.4470 0.5612 -2.8424  
22 C 0.9446 -1.2299 -4.0499  
23 C -0.9765 1.2190 -3.9637  
24 C 1.8073 -2.3155 -3.9311  
25 C 2.1772 -2.7682 -2.6621  
26 C -2.1256 2.7738 -2.5947  
27 C 1.6573 -2.1090 -1.5553  
28 C -1.6414 2.1670 -1.4442  
29 C 0.4996 -2.1589 2.1593  
30 C -0.4267 2.1875 2.1051  
31 C 2.2539 -0.6196 1.8505  
32 C -2.2708 0.5555 1.7581  
33 C 1.1889 -2.8356 3.1572  
34 C -1.1975 2.8190 3.0710  
35 C 2.9963 -1.2676 2.8532  
36 C -3.0003 1.2786 2.7620  
37 C 2.4618 -2.3751 3.5047  
38 C -2.4973 2.3756 3.4089  
39 C 2.6688 0.5551 1.0707  
40 C -2.7099 -0.5986 1.0856  
41 C 3.9024 1.2122 1.2045  
42 C -3.9558 -1.2967 1.2548  
43 C -4.2625 -2.3843 0.4825  
44 C 3.3344 2.7654 -0.4909  
45 C -3.3244 -2.8245 -0.5116  
46 C 2.0980 2.1605 -0.6743  
47 C -2.1189 -2.1455 -0.6373  
48 Ir -0.0077 0.0330 -0.0023  
49 C 1.7359 1.0494 0.1040  
50 C -0.7930 1.0510 -1.5417  
51 C 4.2622 2.3156 0.4445  
52 C -1.8119 2.3229 -3.8741  
53 H 5.2283 2.7991 0.5787

54 H -2.1990 2.8080 -4.7685  
55 C -0.9228 1.0728 1.4186  
56 F -0.7157 3.9058 3.7239  
57 F 3.6620 3.8401 -1.2462  
58 F -2.9376 3.8503 -2.4802  
59 F -4.2555 0.8714 3.1013  
60 F -0.6810 0.7884 -5.2180  
61 F 4.8198 0.7820 2.1108

### **Ir-E**

Atom X Y Z

1 N 0.7767 -1.0277 -1.6510  
2 N 1.0113 -1.0823 1.5047  
3 N -1.0035 1.0317 1.4424  
4 N -1.8293 -1.1047 0.1110  
5 H 0.6676 -0.7921 -5.0228  
6 H -0.7002 0.9288 -4.9917  
7 H 2.1638 -2.7712 -4.8128  
8 H 2.7576 -3.6111 -2.5085  
9 H -2.7628 3.6578 -2.6436  
10 H 1.8206 -2.4198 -0.5237  
11 H -1.9711 2.6134 -0.5375  
12 H 0.7908 -3.6158 3.7136  
13 H -0.7704 3.6430 3.5582  
14 H 3.9736 -0.7652 3.1069  
15 H -3.9433 0.7591 3.0908  
16 H 3.0669 -2.7245 4.3387  
17 H -3.0354 2.7639 4.2486  
18 H 0.4626 2.4676 1.7417  
19 H -0.4646 -2.4917 1.8697  
20 H 4.6187 0.8817 1.8808  
21 H -4.5931 -0.9121 2.0482  
22 H -5.1999 -2.9052 0.6935  
23 H 3.6959 3.5731 -1.1360

24 H -3.5884 -3.7226 -1.0673  
25 H 1.4665 2.5551 -1.5071  
26 H -1.4325 -2.4955 -1.3737  
27 C 0.4430 -0.5570 -2.8896  
28 C -0.4476 0.6095 -2.8466  
29 C 0.9356 -1.1750 -4.0394  
30 C -0.9331 1.2428 -3.9760  
31 C 1.7734 -2.2815 -3.9204  
32 C 2.1053 -2.7502 -2.6482  
33 C -2.1058 2.7899 -2.6475  
34 C 1.5904 -2.0952 -1.5361  
35 C -1.6517 2.1902 -1.4885  
36 C 0.5196 -2.1387 2.1746  
37 C -0.5127 2.1183 2.0717  
38 C 2.2371 -0.5867 1.8285  
39 C -2.2264 0.5418 1.8022  
40 C 1.2264 -2.7602 3.1989  
41 C -1.2106 2.7678 3.0823  
42 C 2.9946 -1.1658 2.8487  
43 C -2.9698 1.1561 2.8117  
44 C 2.4850 -2.2633 3.5402  
45 C -2.4607 2.2787 3.4597  
46 C 2.6415 0.5702 1.0099  
47 C -2.6878 -0.6451 1.0592  
48 C 3.8684 1.1946 1.1576  
49 C -3.9103 -1.2814 1.2861  
50 C -4.2494 -2.3985 0.5251  
51 C 3.3524 2.7213 -0.5521  
52 C -3.3614 -2.8548 -0.4492  
53 C 2.1153 2.1345 -0.7410  
54 C -2.1592 -2.1777 -0.6275  
55 Ir -0.0148 0.0167 -0.0522  
56 C 1.7054 1.0370 0.0374  
57 C -0.8016 1.0704 -1.5432

58 N 4.2083 2.2531 0.3872  
59 N -1.7483 2.3174 -3.8673  
60 C -2.2316 2.9724 -5.0989  
61 H -1.3750 3.3837 -5.6477  
62 H -2.7544 2.2328 -5.7177  
63 H -2.9184 3.7782 -4.8243  
64 C 5.5261 2.8881 0.5898  
65 H 5.5880 3.2644 1.6183  
66 H 6.3136 2.1449 0.4139  
67 H 5.6323 3.7170 -0.1160

### **<sup>3</sup>Ir-E**

Atom X Y Z

1 N 0.7904 -1.0280 -1.6604  
2 N 1.0248 -1.0815 1.5045  
3 N -0.9631 1.0380 1.4213  
4 N -1.7876 -1.1143 0.0945  
5 H 0.6578 -0.7954 -5.0316  
6 H -0.7272 0.9122 -4.9921  
7 H 2.1734 -2.7602 -4.8294  
8 H 2.7915 -3.5918 -2.5286  
9 H -2.7730 3.6454 -2.6341  
10 H 1.8550 -2.4082 -0.5382  
11 H -1.9551 2.6108 -0.5310  
12 H 0.7932 -3.6071 3.7205  
13 H -0.7707 3.5985 3.6015  
14 H 3.9828 -0.7639 3.1140  
15 H -4.0148 0.8054 3.0371  
16 H 3.0691 -2.7183 4.3478  
17 H -3.0923 2.7692 4.2279  
18 H 0.4869 2.4499 1.7986  
19 H -0.4553 -2.4853 1.8670  
20 H 4.6347 0.8778 1.8837  
21 H -4.6205 -0.9005 2.0576



22 H -5.2320 -2.8748 0.6980  
23 H 3.7207 3.5716 -1.1336  
24 H -3.6087 -3.6961 -1.0742  
25 H 1.4885 2.5578 -1.5069  
26 H -1.4372 -2.5111 -1.3739  
27 C 0.4444 -0.5611 -2.8967  
28 C -0.4517 0.6013 -2.8486  
29 C 0.9350 -1.1751 -4.0495  
30 C -0.9509 1.2294 -3.9754  
31 C 1.7843 -2.2735 -3.9348  
32 C 2.1297 -2.7375 -2.6645  
33 C -2.1137 2.7794 -2.6411  
34 C 1.6156 -2.0866 -1.5495  
35 C -1.6463 2.1855 -1.4843  
36 C 0.5286 -2.1348 2.1755  
37 C -0.4998 2.0905 2.0870  
38 C 2.2500 -0.5855 1.8301  
39 C -2.2518 0.5195 1.7619  
40 C 1.2314 -2.7541 3.2037  
41 C -1.2193 2.7404 3.1041  
42 C 3.0039 -1.1634 2.8537  
43 C -3.0247 1.1849 2.7951  
44 C 2.4901 -2.2582 3.5465  
45 C -2.5154 2.2689 3.4506  
46 C 2.6570 0.5710 1.0115  
47 C -2.6757 -0.6040 1.0731  
48 C 3.8855 1.1925 1.1601  
49 C -3.9450 -1.2738 1.2914  
50 C -4.2808 -2.3672 0.5389  
51 C 3.3746 2.7205 -0.5502  
52 C -3.3786 -2.8343 -0.4502  
53 C 2.1361 2.1364 -0.7401  
54 C -2.1492 -2.1652 -0.6236  
55 Ir -0.0003 0.0193 -0.0550

56 C 1.7238 1.0404 0.0381  
57 C -0.7954 1.0673 -1.5447  
58 N 4.2282 2.2502 0.3899  
59 N -1.7674 2.3022 -3.8623  
60 C -2.2643 2.9518 -5.0916  
61 H -1.4138 3.3624 -5.6502  
62 H -2.7917 2.2088 -5.7024  
63 H -2.9497 3.7574 -4.8130  
64 C 5.5473 2.8822 0.5939  
65 H 5.6093 3.2572 1.6229  
66 H 6.3332 2.1375 0.4176  
67 H 5.6557 3.7117 -0.1109

## **Ru**

Atom X Y Z

1 Ru -0.0332 -0.0934 -0.0163  
2 C 1.4591 -2.3037 -1.6003  
3 C 0.2689 -0.7438 -2.8440  
4 C -0.5632 0.4207 -2.8387  
5 C -1.0299 0.9658 -4.0571  
6 C -0.6515 0.3289 -5.2888  
7 C 0.1469 -0.7798 -5.2941  
8 C 0.6338 -1.3505 -4.0681  
9 C 1.4627 -2.4940 -4.0053  
10 C 1.8733 -2.9641 -2.7705  
11 H 2.5133 -3.8417 -2.6841  
12 H 1.7694 -2.9920 -4.9263  
13 H -1.0177 0.7533 -6.2248  
14 H 0.4296 -1.2552 -6.2344  
15 C -1.6434 2.0477 -1.5806  
16 C -1.8476 2.1167 -3.9834  
17 H -2.2289 2.5698 -4.8996  
18 C -2.1517 2.6515 -2.7442  
19 H -2.7798 3.5369 -2.6494

20 N -0.8659 0.9628 -1.6191  
21 N 0.6742 -1.2239 -1.6283  
22 H 1.7635 -2.6582 -0.6162  
23 H -1.8650 2.4523 -0.5937  
24 N 0.9902 -1.1586 1.4645  
25 C 2.2516 -0.6825 1.6983  
26 C 0.5571 -2.1952 2.1863  
27 C 2.6811 0.4339 0.9123  
28 C 3.1181 -1.2484 2.6619  
29 C 1.3525 -2.8147 3.1664  
30 H -0.4525 -2.5461 1.9756  
31 C 3.9756 0.9735 1.0931  
32 N 1.7873 0.9369 0.0063  
33 C 4.4289 -0.6830 2.8289  
34 C 2.6324 -2.3474 3.4070  
35 H 0.9448 -3.6582 3.7228  
36 C 4.8401 0.3808 2.0766  
37 C 4.3389 2.0754 0.2853  
38 C 2.1595 1.9764 -0.7446  
39 H 5.0924 -1.1252 3.5735  
40 H 3.2681 -2.8134 4.1612  
41 H 5.8372 0.8026 2.2103  
42 C 3.4286 2.5711 -0.6311  
43 H 5.3287 2.5217 0.3917  
44 H 1.4240 2.3514 -1.4554  
45 H 3.6748 3.4184 -1.2705  
46 N -1.8477 -1.1154 0.1933  
47 C -2.6661 -0.5711 1.1456  
48 C -2.2809 -2.1822 -0.4830  
49 C -2.1753 0.5761 1.8466  
50 C -3.9425 -1.0974 1.4512  
51 C -3.5374 -2.7663 -0.2442  
52 H -1.6056 -2.5881 -1.2355  
53 C -2.9612 1.1846 2.8523

54 N -0.9372 1.0383 1.4919  
55 C -4.7254 -0.4606 2.4747  
56 C -4.3705 -2.2303 0.7218  
57 H -3.8349 -3.6373 -0.8274  
58 C -4.2549 0.6318 3.1469  
59 C -2.4166 2.3114 3.5101  
60 C -0.4469 2.1019 2.1332  
61 H -5.7091 -0.8724 2.7043  
62 H -5.3488 -2.6678 0.9263  
63 H -4.8564 1.1071 3.9231  
64 C -1.1601 2.7637 3.1482  
65 H -2.9891 2.8102 4.2934  
66 H 0.5420 2.4403 1.8263  
67 H -0.7085 3.6278 3.6347

### **<sup>3</sup>Ru**

Atom X Y Z

1 Ru -0.0057 -0.1080 0.0394  
2 C 1.6111 -2.2087 -1.6311  
3 C 0.2764 -0.7257 -2.8285  
4 C -0.6243 0.3839 -2.7885  
5 C -1.1678 0.9017 -3.9859  
6 C -0.7873 0.2992 -5.2337  
7 C 0.0822 -0.7541 -5.2730  
8 C 0.6422 -1.2991 -4.0673  
9 C 1.5455 -2.3866 -4.0348  
10 C 2.0280 -2.8355 -2.8181  
11 H 2.7261 -3.6696 -2.7589  
12 H 1.8543 -2.8600 -4.9679  
13 H -1.2100 0.7041 -6.1540  
14 H 0.3665 -1.2037 -6.2251  
15 C -1.7757 1.9281 -1.4783  
16 C -2.0612 1.9919 -3.8727  
17 H -2.5046 2.4222 -4.7717

18 C -2.3625 2.4984 -2.6211  
19 H -3.0477 3.3365 -2.4999  
20 N -0.9252 0.9032 -1.5614  
21 N 0.7532 -1.1871 -1.6348  
22 H 1.9718 -2.5456 -0.6598  
23 H -1.9859 2.3058 -0.4790  
24 N 1.0117 -1.1507 1.5208  
25 C 2.2840 -0.6937 1.7346  
26 C 0.5468 -2.1618 2.2601  
27 C 2.7262 0.4052 0.9366  
28 C 3.1416 -1.2635 2.7013  
29 C 1.3361 -2.7815 3.2423  
30 H -0.4742 -2.4830 2.0577  
31 C 4.0319 0.9201 1.0982  
32 N 1.8363 0.9160 0.0339  
33 C 4.4646 -0.7230 2.8524  
34 C 2.6297 -2.3392 3.4635  
35 H 0.9148 -3.6050 3.8175  
36 C 4.8917 0.3224 2.0824  
37 C 4.4044 2.0037 0.2691  
38 C 2.2137 1.9334 -0.7404  
39 H 5.1238 -1.1677 3.5988  
40 H 3.2574 -2.8097 4.2215  
41 H 5.8979 0.7254 2.2036  
42 C 3.4960 2.5036 -0.6472  
43 H 5.4028 2.4340 0.3582  
44 H 1.4764 2.3093 -1.4494  
45 H 3.7532 3.3363 -1.3007  
46 N -1.8076 -1.1370 0.1956  
47 C -2.6679 -0.5256 1.1004  
48 C -2.2441 -2.1969 -0.4975  
49 C -2.1853 0.5958 1.7763  
50 C -3.9901 -1.0262 1.3312  
51 C -3.5242 -2.7309 -0.3253

52 H -1.5404 -2.6397 -1.2032  
53 C -2.9752 1.2550 2.7599  
54 N -0.8878 1.0285 1.4581  
55 C -4.7908 -0.3390 2.3055  
56 C -4.4015 -2.1434 0.5993  
57 H -3.8183 -3.6019 -0.9092  
58 C -4.3054 0.7428 2.9881  
59 C -2.4124 2.3371 3.4458  
60 C -0.3511 2.0626 2.1889  
61 H -5.8014 -0.7045 2.4969  
62 H -5.4021 -2.5518 0.7518  
63 H -4.9252 1.2444 3.7338  
64 C -1.0685 2.7245 3.1540  
65 H -2.9905 2.8648 4.2050  
66 H 0.6690 2.3469 1.9351  
67 H -0.6023 3.5525 3.6875

## Bibliography

- [1] Till J. B. Zähringer, Max Wienhold, Ryan Gilmour, and Christoph Kerzig. Direct observation of triplet states in the isomerization of alkenylboronates by energy transfer catalysis. *J. Am. Chem. Soc.*, 145(39):21576–21586, 2023. PMID: 37729087.
